# Supplementary material for: Natural dimethyl sulfide gradients would lead marine predators to higher prey biomass
Source: PubMed Central journal article supplement (PMC7851116; doi:10.1038/s42003-021-01668-3), 2021-02-01
Supplement: 42003_2021_1668_MOESM1_ESM.pdf [file 42003_2021_1668_MOESM1_ESM.pdf]

## Supplementary Information for:

### Natural dimethyl sulfide gradients would lead marine predators to higher prey biomass

Kylie Owen<sup>1,2,3</sup>, Kentaro Saeki<sup>4</sup>, Joseph D. Warren<sup>5</sup>, Alessandro Bocconcelli<sup>1</sup>, Dave Wiley<sup>6</sup>,  
Shin-Ichi Ohira<sup>4</sup>, Annette Bombosch<sup>1</sup>, Kei Toda<sup>4\*</sup> and Daniel P. Zitterbart<sup>1,7,8\*</sup>

<sup>1</sup>Applied Ocean Physics and Engineering, Woods Hole Oceanographic Institution, Woods Hole, MA, 02543, USA

<sup>2</sup>Institute for Marine and Antarctic Studies, Ecology & Biodiversity Centre, University of Tasmania, Battery Point, TAS, Australia, 7004

<sup>3</sup>Department of Environmental Research and Monitoring, Swedish Museum of Natural History, SE-104 05, Stockholm, Sweden

<sup>4</sup>Department of Chemistry, Kumamoto University, 2-39-1 Kurokami, Kumamoto 860–8555, Japan

<sup>5</sup>School of Marine and Atmospheric Sciences, Stony Brook University, 239 Montauk Hwy, Southampton, NY 11968 USA

<sup>6</sup>Stellwagen Bank National Marine Sanctuary, NOAA National Ocean Service, 175 Edward Foster Road, Scituate, MA 02066, USA

<sup>7</sup>Biophysics Lab, Friedrich-Alexander-Universität Erlangen-Nürnberg, Henkestrasse 91, 91052 Erlangen

<sup>8</sup>International Research Organization for Advanced Science and Technology (IROAST), Kumamoto University, 2-39-1 Kurokami, Kumamoto 860–8555, Japan

\*corresponding authors

**Supplementary Table 1: Details of dimethyl sulfide (DMS) and prey biomass measurements taken off Cape Cod, USA over five days in June 2019.** DMS was measured in both air ( $\text{DMS}_g$ ) and seawater ( $\text{DMS}_{aq}$ ). Prey biomass was measured acoustically (Nautical Area Scattering Coefficient (NASC) ( $\text{m}^2 \text{nm}^{-2}$ )) for both zooplankton and fish. Fish biomass was estimated using 38 kHz backscatter, and consequently, only represents swim-bladdered fish. Since zooplankton and fish NASC values are from different acoustic frequencies (710 kHz, 38kHz, respectively), the values for the different taxa cannot be directly compared with each other.

| Date         | Distance covered (km) | $\text{DMS}_g$ (ppb)<br>mean $\pm$ SD | $\text{DMS}_{aq}$ (nM)<br>mean $\pm$ SD | Prey biomass ( $\text{m}^2 \text{nm}^{-2}$ ) |                             |
|--------------|-----------------------|---------------------------------------|-----------------------------------------|----------------------------------------------|-----------------------------|
|              |                       |                                       |                                         | Zooplankton<br>mean $\pm$ SD                 | Fish<br>mean $\pm$ SD       |
| 23 June 2019 | 71.3                  | 8.2 $\pm$ 2.0 (n = 63)                | 15.2 $\pm$ 3.0 (n = 63)                 | 143.2 $\pm$ 97.5 (n = 63)                    | 152.4 $\pm$ 97.5 (n = 63)   |
| 24 June 2019 | 38.9                  | 3.6 $\pm$ 2.0 (n = 43)                | 5.4 $\pm$ 2.9 (n = 42)                  | 101.0 $\pm$ 72.8 (n = 43)                    | 73.0 $\pm$ 10.4 (n = 43)    |
| 26 June 2019 | 11.7                  | 3.2 $\pm$ 1.3 (n = 31)                | 3.8 $\pm$ 0.5 (n = 31)                  | 3.6 $\pm$ 5.4 (n = 23)                       | 130.8 $\pm$ 48.4 (n = 23)   |
| 27 June 2019 | 79.2                  | 1.9 $\pm$ 0.7 (n = 43)                | 5.1 $\pm$ 4.0 (n = 43)                  | 34.2 $\pm$ 44.5 (n = 42)                     | 215.8 $\pm$ 153.3 (n = 42)  |
| 28 June 2019 | 19.1                  | 1.1 $\pm$ 0.6 (n = 14)                | 4.0 $\pm$ 1.0 (n = 14)                  | 6.9 $\pm$ 6.2 (n = 2)                        | 251.5 $\pm$ 213.4 (n = 14)  |
| Summary      | 220.2                 | 4.5 $\pm$ 3.1 (n = 194)               | 8.2 $\pm$ 5.7 (n = 193)                 | 86.1 $\pm$ 90.0 (n = 173)                    | 153.1 $\pm$ 141.3 (n = 185) |
